# Supplementary material for: Widening Excess Mortality During the COVID-19 Pandemic in Individuals Who Self-Harmed
Source: Atypon-hosted journal article supplement (doi:10.1027/0227-5910/a000882), 2022-10-13
Supplement: 0227-5910_a000882_esm1.pdf [file 0227-5910_a000882_esm1.pdf]

**ESM 1 Table E1:** Data sources used in this study.

| Database (Abbreviation)                                                           | Description                                                                                                                                                                                                                        | Coverage at time of data extraction*                             |
|-----------------------------------------------------------------------------------|------------------------------------------------------------------------------------------------------------------------------------------------------------------------------------------------------------------------------------|------------------------------------------------------------------|
| Welsh Demographic Service (WDS)                                                   | An administrative register of all individuals in Wales that use NHS services, containing anonymised demographics, deaths, and GP practice registration history with anonymized residential data                                    | Up to 08/05/2021                                                 |
| Office for National Statistics (ONS)–Mortality register (ADDD, ADDE) <sup>§</sup> | Death register of all deaths and causes in Wales, coded using International Classification of Diseases (ICD), version 10 codes, derived from information collected at registration of death. Daily and monthly extracts available. | Up to 06/30/2021                                                 |
| Consolidated Deaths Data Source (CDDS) <sup>§</sup>                               | Combination of death records from the Wales Demographic Service Dataset, Master Patient Index, and ONS Deaths.                                                                                                                     | Up to 08/05/2021                                                 |
| Welsh Longitudinal General Practice (WLGP)                                        | Primary care records with diagnoses, symptoms, investigations, prescribed medication, referrals, coded hospital contacts, and test results coded using Read Codes v2                                                               | 80% (330/412) of all general practices in Wales up to 06/30/2021 |
| Emergency Department Data Set (EDDS, EDD) <sup>†</sup>                            | Administrative and clinical information (general reason for attendance and attendance group to identify types of contacts) for all NHS Wales Accident and Emergency department attendances.                                        | From 2009 Up to 06/30/2021                                       |
| Patient Episode Database for Wales (PEDW) <sup>‡</sup>                            | Clinical information (specialty and diagnoses) of all NHS Wales hospital admissions (inpatient and day cases) – diagnostic information coded using ICD-10 codes.                                                                   | Up to 06/30/2021                                                 |
| Outpatient Dataset for Wales (OPDW)                                               | Attendance information for all NHS Wales hospital outpatient appointments, including scheduled outpatient appointments, specialty of care, appointment date and attendance status, and those where the patient failed to attend.   | Up to 06/30/2021                                                 |
| Welsh Laboratory Information Systems Database (LIMS)                              | Clinical system that stores, records and exchanges both COVID-19 antigen/swab tests (pillar 1 and pillar 2), and serology/antibodies tests (pillar 3) results from NHS Wales laboratories.                                         | Form 02/05/2020 to 08/05/2021                                    |
| Wales Immunisation System (WIS)                                                   | Information on vaccination data, priority/risk group information and limited demographic information, e.g., ethnicity, based on all WDS registered individuals in Wales.                                                           | Up to 06/30/2021                                                 |
| Care Homes Data (CARE)                                                            | Contains geographic information data about care homes.                                                                                                                                                                             | Up to 08/05/2021                                                 |
| Education Wales (EDUW)                                                            | Schools and Pupil data for Wales, including limited demographics (ethnicity).                                                                                                                                                      | School aged pupils in Wales up to 08/05/2021                     |
| COVID-19 Shielded People list (CVSP)                                              | List of high-risk individuals advised to self-isolate during COVID-19 pandemic.                                                                                                                                                    | Up to 08/05/2021                                                 |
| ONS Census 2011 Wales (CENW)                                                      | Data of the latest census held on March 2011 for all people and households.                                                                                                                                                        | 03/27/2011                                                       |

\* Data have full Wales coverage throughout the study period unless otherwise shown.

§ User guide to mortality statistics - Office for National Statistics. [Online]. Available:

<https://www.ons.gov.uk/peoplepopulationandcommunity/birthsdeathsandmarriages/deaths/methodologies/userguidetomortalitystatisticsjuly2017>

† Digital Health and Care Wales (previously NHS Wales Informatics Service), Emergency Department Data Set structure. [Online]. Available: <http://www.datadictionary.wales.nhs.uk/#!/WordDocuments/datasetstructure4.htm>

‡ Digital Health and Care Wales (previously NHS Wales Informatics Service), Patient Episode Database for Wales Data Set structure. [Online]. Available: <http://www.datadictionary.wales.nhs.uk/#!/WordDocuments/datasetstructure.htm>

**ESM 1 Table E2:** Variables used in the analysis of risk of mortality in the self-harm cohort.

| Variable*                                                                    | Data source**                | Analysis                             |                                        |                       |                                                       |                      |                                     |                                                  |
|------------------------------------------------------------------------------|------------------------------|--------------------------------------|----------------------------------------|-----------------------|-------------------------------------------------------|----------------------|-------------------------------------|--------------------------------------------------|
|                                                                              |                              | For propensity scores matching (PSM) |                                        |                       | For difference-in-difference (DiD) analysis after PSM |                      |                                     |                                                  |
|                                                                              |                              | Included? (Y/N)                      | Time of Measurement                    | Categories            | Included? (Y/N)                                       | Time-fixed/ varying? | Categories                          | Time of Measurement                              |
| Calendar time                                                                | -                            | N                                    | -                                      | -                     | Y                                                     | Time-varying         | Half-year period started from April | -                                                |
| Self-harm                                                                    | EDDS, EDDD, PEDW, OPDW, WLGP | N                                    | -                                      | -                     | Y                                                     | Time-fixed           | Yes, No                             | -                                                |
| Sex                                                                          | WSDS                         | Y                                    | -                                      | Male, Female          | -                                                     | Time-fixed           | -                                   | -                                                |
| Age                                                                          | WSDS                         | Y                                    | At index date                          | Continuous            | Y***                                                  | Time-varying         | 10-24, 25-64, 65+                   | At start dates of each half-year period          |
| Ethnicity                                                                    | CENW, PEDW, EDUW, WIS        | Y                                    | -                                      | White, non-White      | N                                                     | -                    | -                                   | -                                                |
| Area deprivation (WIMD quintile) <sup>1</sup>                                | WSDS                         | Y                                    | At index date                          | Q1 to Q5              | N***                                                  | -                    | -                                   | -                                                |
| Urban/Rural indicator <sup>2</sup>                                           | WSDS                         | Y                                    | At index date                          | Urban, Rural          | N                                                     | -                    | -                                   | -                                                |
| Health Board                                                                 | WSDS                         | Y                                    | At index date                          | 7 health boards (A-G) | Y                                                     | Time-varying         | 7 health boards                     | At start dates of each half-year period          |
| Live in care homes <sup>3</sup>                                              | CARE                         | Y                                    | At index date                          | Yes, No               | Y                                                     | Time-varying         | Yes, No                             | At start dates of each half-year period          |
| Ever had COVID-19 infection <sup>4</sup>                                     | LIMS, PEDW, WLGP             | N                                    | -                                      | -                     | Y****                                                 | Time-varying         | Yes, No                             | 6 months to start dates of each half-year period |
| In COVID-19 shielded list <sup>5</sup>                                       | CVSP                         | N                                    | -                                      | -                     | Y                                                     | Time-fixed           | Yes, No                             | -                                                |
| Charlson Comorbidity Index (unweighted) <sup>6</sup>                         | PEDW, OPDW, WLGP             | Y                                    | 1 year before index date to index date | 0, 1, 2, 3+           | Y                                                     | Time-varying         | 0, 1, 2, 3+                         | 6 months to start dates of each half-year period |
| Ever Smoked <sup>7</sup>                                                     | WLGP                         | Y                                    | Ever up to index date                  | Yes, No               | N                                                     | -                    | -                                   | -                                                |
| History of alcohol misuse <sup>8</sup>                                       | EDDS, EDDD, PEDW, OPDW, WLGP | Y                                    | Ever up to index date                  | Yes, No               | Y                                                     | Time-varying         | Yes, No                             | At start dates of each half-year period          |
| History of drugs misuse <sup>8</sup>                                         | EDDS, EDDD, PEDW, OPDW, WLGP | Y                                    | Ever up to index date                  | Yes, No               | Y                                                     | Time-varying         | Yes, No                             | At start dates of each half-year period          |
| History of depression and anxiety <sup>8</sup>                               | EDDS, EDDD, PEDW, OPDW, WLGP | Y                                    | Ever up to index date                  | Yes, No               | N                                                     | -                    | -                                   | -                                                |
| History of severe mental illnesses (SMI) <sup>9</sup>                        | EDDS, EDDD, PEDW, OPDW, WLGP | Y                                    | Ever up to index date                  | Yes, No               | N                                                     | -                    | -                                   | -                                                |
| History of developmental disorders <sup>10</sup>                             | EDDS, EDDD, PEDW, OPDW, WLGP | Y                                    | Ever up to index date                  | Yes, No               | N                                                     | -                    | -                                   | -                                                |
| History of obsessive compulsive disorder (OCD)/eating disorder <sup>11</sup> | EDDS, EDDD, PEDW, OPDW, WLGP | Y                                    | Ever up to index date                  | Yes, No               | N                                                     | -                    | -                                   | -                                                |

|                                                                           |           |   |                       |            |   |              |   |                                                  |
|---------------------------------------------------------------------------|-----------|---|-----------------------|------------|---|--------------|---|--------------------------------------------------|
| Ever prescribed psychotropic medications <sup>12</sup>                    | WLGP      | Y | Ever up to index date | Yes, No    | Y | Time-varying | - | 6 months to start dates of each half-year period |
| Ever prescribed opiates medications <sup>12</sup>                         | WLGP      | Y | Ever up to index date | Yes, No    | Y | Time-varying | - | 6 months to start dates of each half-year period |
| Number of moves in residential address                                    | WDS       | Y | Ever up to index date | Continuous | N | -            | - | -                                                |
| % of length of residence in Wales to age at index date                    | WDS       | Y | Ever up to index date | Continuous | N | -            | - | -                                                |
| % of duration of valid GP data length of residence in Wales <sup>13</sup> | WDS, WLGP | Y | Ever up to index date | Continuous | N | -            | - | -                                                |

\* All references for the list of codes used are cited in the References list in ESM 3.

\*\* Refer to Table E1 in ESM 1 for abbreviations of data sources

\*\*\* Subgroup analyses by sex, age, and area deprivation are performed. In those analyses, the corresponding stratified variables are omitted.

\*\*\*\* Modeling for both including and excluding the COVID-19 infection variable is performed.

<sup>1</sup> Welsh Index of Multiple Deprivation with Q5 as the most deprived areas, refer to Welsh Government (2017) for the detailed methodological descriptions.

<sup>2</sup> Refer to Barham and Begum (2006) for the detailed methodological descriptions.

<sup>3</sup> Refer to Hollinghurst et al. (2021) for the detailed methodological descriptions.

<sup>4</sup> Refer to DelPozo-Banos et al. (2021) for the detailed methodological descriptions.

<sup>5</sup> Refer to <https://nwis.nhs.wales/news/latest-news/identifying-vulnerable-patient-lists/> and <https://nwis.nhs.wales/coronavirus/digital-support-updates-for-healthcare-professionals/identifying-shielding-patients/> for the identification of vulnerable patients.

<sup>6</sup> Refer to Charlson et al. (1987) for its definition and Khan et al. (2010) and for the list of codes used.

<sup>7</sup> Refer to Atkinson et al. (2017) for the detailed methodological descriptions.

<sup>8</sup> Refer to John et al. (2020) for list of codes used.

<sup>9</sup> Refer to John et al. (2018) for list of codes used.

<sup>10</sup> It consists of autism spectrum disorder, attention deficit hyperactivity disorder, learning difficulties, and conduct disorders. Refer to Burt et al. (2004), Brophy et al. (2018), Underwood et al. (2019), and John et al. (2019) for list of codes used.

<sup>11</sup> Refer to John et al. (2021) for list of codes used.

<sup>12</sup> Refer to John et al. (2020) for list of codes used.

<sup>13</sup> Refer to Davies et al. (2018) and Thayer et al. (2020) for the description of defining duration of valid GP data.

**ESM 1 Table E3.** Sample characteristics of the self-harm cohort before and after propensity score matching (PSM).

|                                                           |                         | Self-harm (unmatched) |      | No self-harm (unmatched) |      | Self-harm (matched) |      | No self-harm (matched) |      |
|-----------------------------------------------------------|-------------------------|-----------------------|------|--------------------------|------|---------------------|------|------------------------|------|
|                                                           |                         | Numbers               | %    | Numbers                  | %    | Numbers             | %    | Numbers                | %    |
| Total                                                     |                         | 45,422                | -    | 2,558,599                | -    | 43,368              | -    | 43,368                 | -    |
| Sex                                                       | Male                    | 20,843                | 45.9 | 1,286,132                | 50.3 | 19,859              | 45.8 | 19,859                 | 45.8 |
|                                                           | Female                  | 24,579                | 54.1 | 1,272,467                | 49.7 | 23,509              | 54.2 | 23,509                 | 54.2 |
| Age                                                       | 10-24 yr                | 17,342                | 38.2 | 492,480                  | 19.2 | 16,609              | 38.3 | 16,609                 | 38.3 |
|                                                           | 25-64 yr                | 24,460                | 53.9 | 1,469,182                | 57.4 | 23,186              | 53.5 | 23,186                 | 53.5 |
|                                                           | 65 yr +                 | 3,620                 | 8.0  | 596,937                  | 23.3 | 3,573               | 8.2  | 3,573                  | 8.2  |
| Ethnicity                                                 | White                   | 40,495                | 89.2 | 2,216,190                | 86.6 | 38,662              | 89.1 | 38,812                 | 89.5 |
|                                                           | non-White               | 1,227                 | 2.7  | 97,819                   | 3.8  | 1,205               | 2.8  | 1,144                  | 2.6  |
|                                                           | Unknown                 | 3,700                 | 8.1  | 244,590                  | 9.6  | 3,501               | 8.1  | 3,412                  | 7.9  |
| WIMD quintile*<br>(Q5: most deprived)                     | Q1                      | 5,525                 | 12.2 | 527,022                  | 20.6 | 5,323               | 12.3 | 5,323                  | 12.3 |
|                                                           | Q2                      | 6,293                 | 13.9 | 512,743                  | 20.0 | 6,047               | 13.9 | 6,047                  | 13.9 |
|                                                           | Q3                      | 8,246                 | 18.2 | 525,543                  | 20.5 | 7,871               | 18.1 | 7,871                  | 18.1 |
|                                                           | Q4                      | 11,045                | 24.3 | 504,395                  | 19.7 | 10,518              | 24.3 | 10,518                 | 24.3 |
|                                                           | Q5                      | 14,313                | 31.5 | 488,896                  | 19.1 | 13,609              | 31.4 | 13,609                 | 31.4 |
| Urban/Rural indicator*                                    | Rural                   | 11,204                | 24.7 | 795,666                  | 31.1 | 10,780              | 24.9 | 10,848                 | 25.0 |
|                                                           | Urban                   | 34,218                | 75.3 | 1,762,933                | 68.9 | 32,588              | 75.1 | 32,520                 | 75.0 |
| Health board*                                             | A                       | 8,264                 | 18.2 | 567,260                  | 22.2 |                     | 18.4 | 7,947                  | 18.3 |
|                                                           | B                       | 5,179                 | 11.4 | 310,042                  | 12.1 | 4,877               | 11.2 | 4,837                  | 11.2 |
|                                                           | C                       | 8,366                 | 18.4 | 316,203                  | 12.4 | 7,819               | 18.0 | 7,984                  | 18.4 |
|                                                           | D                       | 5,453                 | 12.0 | 412,414                  | 16.1 | 5,316               | 12.3 | 5,166                  | 11.9 |
|                                                           | E                       | 7,752                 | 17.1 | 362,412                  | 14.2 | 7,390               | 17.0 | 7,472                  | 17.2 |
|                                                           | F                       | 8,821                 | 19.4 | 483,684                  | 18.9 | 8,487               | 19.6 | 8,420                  | 19.4 |
|                                                           | G                       | 1,587                 | 3.5  | 106,584                  | 4.2  | 1,518               | 3.5  | 1,542                  | 3.6  |
| Live in care homes*                                       |                         | 258                   | 0.6  | 12,570                   | 0.5  | 236                 | 0.5  | 224                    | 0.5  |
| Charlson Comorbidity Index** (unweighted)                 | 0                       | 39,088                | 86.1 | 2,262,893                | 88.4 | 37,480              | 86.4 | 37,466                 | 86.4 |
|                                                           | 1                       | 4,770                 | 10.5 | 229,909                  | 9.0  | 4,441               | 10.2 | 4,483                  | 10.3 |
|                                                           | 2                       | 979                   | 2.2  | 46,254                   | 1.8  | 902                 | 2.1  | 911                    | 2.1  |
|                                                           | 3+                      | 585                   | 1.3  | 19,543                   | 0.8  | 545                 | 1.3  | 508                    | 1.2  |
| Ever smoked***                                            |                         | 26,533                | 58.4 | 1,197,986                | 46.8 | 24,718              | 57.0 | 24,804                 | 57.2 |
| History of***                                             | Alcohol misuse          | 10,355                | 22.8 | 126,585                  | 4.9  | 8,780               | 20.2 | 8,521                  | 19.6 |
|                                                           | Drugs misuse            | 7,970                 | 17.5 | 41,361                   | 1.6  | 6,337               | 14.6 | 6,101                  | 14.1 |
|                                                           | Depression and anxiety  | 26,560                | 58.5 | 441,270                  | 17.2 | 24,618              | 56.8 | 24,829                 | 57.3 |
|                                                           | SMI                     | 6,238                 | 13.7 | 73,554                   | 2.9  | 5,276               | 12.2 | 5,214                  | 12.0 |
|                                                           | Developmental disorders | 4,124                 | 9.1  | 47,736                   | 1.9  | 3,472               | 8.0  | 3,521                  | 8.1  |
|                                                           | OCD/Eating disorders    | 2,498                 | 5.5  | 33,915                   | 1.3  | 2,165               | 5.0  | 2,193                  | 5.1  |
|                                                           | Psychotropics           | 29,129                | 64.1 | 928,050                  | 36.3 | 27,183              | 62.7 | 27,515                 | 63.4 |
| Ever prescribed***                                        | Opiates                 | 24,018                | 52.9 | 1,169,109                | 45.7 | 22,637              | 52.2 | 22,853                 | 52.7 |
|                                                           |                         |                       |      |                          |      |                     |      |                        |      |
| Number of moves***                                        | 0                       | 7,623                 | 16.8 | 775,127                  | 30.3 | 7,558               | 17.4 | 7,055                  | 16.3 |
|                                                           | 1                       | 7,375                 | 16.2 | 612,756                  | 23.9 | 7,282               | 16.8 | 7,426                  | 17.1 |
|                                                           | 2                       | 6,328                 | 13.9 | 414,684                  | 16.2 | 6,212               | 14.3 | 6,455                  | 14.9 |
|                                                           | 3+                      | 24,096                | 53.0 | 756,032                  | 29.5 | 22,316              | 51.5 | 22,432                 | 51.7 |
| % of length of residence in Wales to age at index date*** | [0-20]                  | 18,687                | 41.1 | 813,086                  | 31.8 | 17,202              | 39.7 | 17,428                 | 40.2 |
|                                                           | (20-40]                 | 10,752                | 23.7 | 773,235                  | 30.2 | 10,476              | 24.2 | 10,115                 | 23.3 |
|                                                           | (40-60]                 | 5,603                 | 12.3 | 472,354                  | 18.5 | 5,504               | 12.7 | 5,682                  | 13.1 |
|                                                           | (60-80]                 | 3,174                 | 7.0  | 163,141                  | 6.4  | 3,108               | 7.2  | 3,073                  | 7.1  |
|                                                           | (80-100]                | 7,206                 | 15.9 | 336,783                  | 13.2 | 7,078               | 16.3 | 7,070                  | 16.3 |
| % of valid GP data to length of residence in Wales***     | [0-20]                  | 6,739                 | 14.8 | 522,858                  | 20.4 | 6,484               | 15.0 | 6,539                  | 15.1 |
|                                                           | (20-40]                 | 1,473                 | 3.2  | 93,064                   | 3.6  | 1,411               | 3.3  | 1,382                  | 3.2  |
|                                                           | (40-60]                 | 1,970                 | 4.3  | 158,646                  | 6.2  | 1,904               | 4.4  | 1,780                  | 4.1  |
|                                                           | (60-80]                 | 2,799                 | 6.2  | 214,576                  | 8.4  | 2,703               | 6.2  | 2,752                  | 6.3  |
|                                                           | (80-100]                | 32,441                | 71.4 | 1,569,455                | 61.3 | 30,866              | 71.2 | 30,915                 | 71.3 |
| Follow-up period (years)                                  |                         | 2.8 (1.5, 4.0)        |      | 2.8 (1.6, 4.1)           |      | 2.7 (1.5 - 4.0)     |      | 2.8 (1.5, 4.0)         |      |

\* measured at index dates

\*\* measured a period from 1 year before to index dates

\*\*\* measured from available record up to index dates

\*\*\*\* expressed as median and interquartile range

**ESM 1 Table E4.** Diagnostic checks on PSM of the self-harm cohort by absolute standardized mean differences (SMDs) and variance ratios.

| Variable                                                 |                                           | Unmatched     |           |              |           |              |                | Matched   |           |              |           |              |                |       |
|----------------------------------------------------------|-------------------------------------------|---------------|-----------|--------------|-----------|--------------|----------------|-----------|-----------|--------------|-----------|--------------|----------------|-------|
|                                                          |                                           | Self-harm     |           | No-self-harm |           | Absolute SMD | Variance ratio | Self-harm |           | No-self-harm |           | Absolute SMD | Variance ratio |       |
|                                                          |                                           | Mean          | Variance  | Mean         | Variance  |              |                | Mean      | Variance  | Mean         | Variance  |              |                |       |
| Sex                                                      |                                           | 0.541         | 0.248     | 0.497        | 0.250     | 0.088        | 0.993          | 0.542     | 0.248     | 0.542        | 0.248     | 0.000        | 1.000          |       |
| Age                                                      |                                           | 34.556        | 333.773   | 46.444       | 445.157   | 0.602        | 0.750          | 34.701    | 341.914   | 34.793       | 341.951   | 0.005        | 1.000          |       |
| WIMD quintile, urban/rural indicator (Q5: most deprived) | Q1, Rural                                 | 0.032         | 0.031     | 0.058        | 0.054     | 0.123        | 0.575          | 0.033     | 0.032     | 0.034        | 0.032     | 0.005        | 0.972          |       |
|                                                          | Q1, Urban                                 | 0.089         | 0.081     | 0.148        | 0.126     | 0.183        | 0.644          | 0.090     | 0.082     | 0.089        | 0.081     | 0.003        | 1.010          |       |
|                                                          | Q2, Rural                                 | 0.059         | 0.055     | 0.096        | 0.087     | 0.139        | 0.640          | 0.060     | 0.056     | 0.058        | 0.055     | 0.008        | 1.029          |       |
|                                                          | Q2, Urban                                 | 0.080         | 0.073     | 0.105        | 0.094     | 0.086        | 0.783          | 0.080     | 0.073     | 0.081        | 0.075     | 0.007        | 0.980          |       |
|                                                          | Q3, Rural                                 | 0.064         | 0.060     | 0.086        | 0.079     | 0.083        | 0.765          | 0.065     | 0.061     | 0.067        | 0.063     | 0.009        | 0.971          |       |
|                                                          | Q3, Urban                                 | 0.117         | 0.104     | 0.119        | 0.105     | 0.006        | 0.985          | 0.117     | 0.103     | 0.114        | 0.101     | 0.007        | 1.016          |       |
|                                                          | Q4, Rural                                 | 0.056         | 0.053     | 0.049        | 0.047     | 0.029        | 1.125          | 0.056     | 0.053     | 0.056        | 0.053     | 0.002        | 1.009          |       |
|                                                          | Q4, Urban                                 | 0.187         | 0.152     | 0.148        | 0.126     | 0.106        | 1.208          | 0.186     | 0.152     | 0.187        | 0.152     | 0.001        | 0.998          |       |
|                                                          | Q5, Rural                                 | 0.035         | 0.034     | 0.022        | 0.021     | 0.079        | 1.581          | 0.035     | 0.034     | 0.036        | 0.035     | 0.004        | 0.978          |       |
|                                                          | Q5, Urban                                 | 0.280         | 0.202     | 0.169        | 0.141     | 0.268        | 1.434          | 0.279     | 0.201     | 0.278        | 0.201     | 0.002        | 1.002          |       |
| Ethnicity                                                | White                                     | 0.893         | 0.095     | 0.868        | 0.115     | 0.078        | 0.832          | 0.891     | 0.097     | 0.895        | 0.094     | 0.011        | 1.029          |       |
|                                                          | non-White                                 | 0.027         | 0.026     | 0.038        | 0.037     | 0.063        | 0.715          | 0.028     | 0.027     | 0.026        | 0.026     | 0.009        | 1.052          |       |
|                                                          | Unknown                                   | 0.080         | 0.073     | 0.094        | 0.085     | 0.050        | 0.864          | 0.081     | 0.074     | 0.079        | 0.072     | 0.008        | 1.024          |       |
| Health board                                             | A                                         | 0.182         | 0.149     | 0.222        | 0.173     | 0.099        | 0.863          | 0.184     | 0.150     | 0.183        | 0.150     | 0.001        | 1.001          |       |
|                                                          | B                                         | 0.114         | 0.101     | 0.121        | 0.106     | 0.022        | 0.949          | 0.112     | 0.100     | 0.112        | 0.099     | 0.003        | 1.007          |       |
|                                                          | C                                         | 0.184         | 0.150     | 0.124        | 0.108     | 0.169        | 1.387          | 0.180     | 0.148     | 0.184        | 0.150     | 0.010        | 0.984          |       |
|                                                          | D                                         | 0.120         | 0.106     | 0.161        | 0.135     | 0.119        | 0.781          | 0.123     | 0.108     | 0.119        | 0.105     | 0.011        | 1.025          |       |
|                                                          | E                                         | 0.171         | 0.142     | 0.142        | 0.122     | 0.080        | 1.164          | 0.170     | 0.141     | 0.172        | 0.143     | 0.005        | 0.991          |       |
|                                                          | F                                         | 0.194         | 0.156     | 0.189        | 0.153     | 0.013        | 1.021          | 0.196     | 0.157     | 0.194        | 0.156     | 0.004        | 1.006          |       |
|                                                          | G                                         | 0.035         | 0.034     | 0.042        | 0.040     | 0.035        | 0.845          | 0.035     | 0.034     | 0.036        | 0.034     | 0.003        | 0.985          |       |
| Charlson Comorbidity Index (unweighted)                  | 0                                         | 0.861         | 0.120     | 0.884        | 0.102     | 0.072        | 1.174          | 0.864     | 0.117     | 0.864        | 0.118     | 0.001        | 0.998          |       |
|                                                          | 1                                         | 0.105         | 0.094     | 0.090        | 0.082     | 0.051        | 1.149          | 0.102     | 0.092     | 0.103        | 0.093     | 0.003        | 0.992          |       |
|                                                          | 2                                         | 0.022         | 0.021     | 0.018        | 0.018     | 0.025        | 1.188          | 0.021     | 0.020     | 0.021        | 0.021     | 0.001        | 0.990          |       |
|                                                          | 3+                                        | 0.013         | 0.013     | 0.008        | 0.008     | 0.052        | 1.677          | 0.013     | 0.012     | 0.012        | 0.012     | 0.008        | 1.072          |       |
|                                                          | Live in care homes                        | 0.006         | 0.006     | 0.005        | 0.005     | 0.011        | 1.155          | 0.005     | 0.005     | 0.005        | 0.005     | 0.004        | 1.053          |       |
| History of                                               | Depression and anxiety                    | 0.585         | 0.243     | 0.172        | 0.143     | 0.939        | 1.701          | 0.568     | 0.245     | 0.573        | 0.245     | 0.010        | 1.003          |       |
|                                                          | SMI                                       | 0.137         | 0.118     | 0.029        | 0.028     | 0.401        | 4.243          | 0.122     | 0.107     | 0.120        | 0.106     | 0.004        | 1.010          |       |
|                                                          | Developmental disorders                   | 0.091         | 0.083     | 0.019        | 0.018     | 0.321        | 4.508          | 0.080     | 0.074     | 0.081        | 0.075     | 0.004        | 0.987          |       |
|                                                          | OCD/Eating disorders                      | 0.055         | 0.052     | 0.013        | 0.013     | 0.231        | 3.974          | 0.050     | 0.047     | 0.051        | 0.048     | 0.003        | 0.988          |       |
|                                                          | Alcohol misuse                            | 0.228         | 0.176     | 0.049        | 0.047     | 0.535        | 3.743          | 0.202     | 0.161     | 0.196        | 0.158     | 0.015        | 1.023          |       |
|                                                          | Drugs misuse                              | 0.175         | 0.145     | 0.016        | 0.016     | 0.562        | 9.097          | 0.146     | 0.125     | 0.141        | 0.121     | 0.016        | 1.032          |       |
|                                                          | Ever prescribed                           | Psychotropics | 0.641     | 0.230        | 0.363     | 0.231        | 0.580          | 0.995     | 0.627     | 0.234        | 0.634     | 0.232        | 0.016          | 1.009 |
|                                                          |                                           | Opiates       | 0.529     | 0.249        | 0.457     | 0.248        | 0.144          | 1.004     | 0.522     | 0.250        | 0.527     | 0.249        | 0.010          | 1.001 |
|                                                          | Ever smoked                               | 0.584         | 0.243     | 0.468        | 0.249     | 0.234        | 0.976          | 0.570     | 0.245     | 0.572        | 0.245     | 0.004        | 1.001          |       |
|                                                          | Number of moves                           | 3.841         | 15.413    | 1.971        | 5.182     | 0.583        | 2.974          | 3.596     | 12.874    | 3.611        | 12.820    | 0.004        | 1.004          |       |
|                                                          | % of length of residence in Wales to age  | 37.020        | 986.654   | 38.295       | 808.940   | 0.043        | 1.220          | 37.806    | 990.823   | 37.786       | 988.885   | 0.001        | 1.002          |       |
|                                                          | % of valid GP data to length of residence | 78.350        | 1,290.295 | 70.755       | 1,545.165 | 0.202        | 0.835          | 78.173    | 1,296.691 | 78.221       | 1,294.872 | 0.001        | 1.001          |       |

**ESM 1 Table E5.** Summary of ratios of hazard ratios (RHRs) based on DiD analyses for change in all-cause mortality risk during COVID-19 for the matched self-harm cohort.

|                                                       | COVID-19 infection variable included? | Wave 1 |                 |         | Wave 2 |                 |         |
|-------------------------------------------------------|---------------------------------------|--------|-----------------|---------|--------|-----------------|---------|
|                                                       |                                       | RHR    | 95% CI          | p-value | RHR    | 95% CI          | p-value |
| Main analysis                                         | Yes                                   | 2.033  | (1.036 - 4.029) | 0.042   | 2.190  | (1.117 - 4.287) | 0.023   |
|                                                       | No                                    | 2.043  | (1.027 - 4.041) | 0.041   | 2.220  | (1.144 - 4.379) | 0.021   |
| Robustness check                                      | Yes                                   | 1.161  | (0.502 - 2.694) | 0.723   | 1.083  | (0.717 - 2.520) | 0.452   |
|                                                       | No                                    | 1.144  | (0.494 - 2.680) | 0.745   | 1.079  | (0.718 - 2.511) | 0.453   |
| Sensitivity analysis (using incident self-harm cases) | Yes                                   | 1.543  | (0.673 - 3.535) | 0.306   | 1.210  | (0.508 - 2.871) | 0.655   |
|                                                       | No                                    | 1.539  | (0.669 - 3.526) | 0.315   | 1.283  | (0.545 - 3.040) | 0.564   |
| Sensitivity analysis (analysis without PSM*)          | Yes                                   | 1.605  | (1.112 - 2.321) | 0.032   | 1.617  | (1.124 - 2.315) | 0.017   |
|                                                       | No                                    | 1.631  | (1.125 - 2.373) | 0.030   | 1.641  | (1.141 - 2.376) | 0.012   |

\* propensity score matching

**ESM 1 Table E6.** Summary of RHRs for subgroup analyses for change in all-cause mortality risk during COVID-19 for the matched self-harm cohort.

|                  |                | Wave 1 |                  |         | Wave 2 |                  |         |
|------------------|----------------|--------|------------------|---------|--------|------------------|---------|
|                  |                | RHR    | 95% CI           | p-value | RHR    | 95% CI           | p-value |
| Sex              | Male           | 1.900  | (0.792 - 4.572)  | 0.151   | 2.646  | (1.114 - 6.346)  | 0.027   |
|                  | Female         | 2.841  | (0.951 - 8.524)  | 0.063   | 1.930  | (0.643 - 5.817)  | 0.243   |
| Ratio of RHR*    | (ref: Male)    | 1.499  | (0.366 - 6.104)  | 0.571   | 0.727  | (0.185 - 2.966)  | 0.659   |
| Age              | < 65 yr        | 3.291  | (0.955 - 11.340) | 0.056   | 3.850  | (1.265 - 11.692) | 0.018   |
|                  | 65 yr +        | 1.787  | (0.703 - 4.510)  | 0.217   | 1.747  | (0.707 - 4.277)  | 0.225   |
| Ratio of RHR*    | (ref: 65 yr +) | 1.840  | (0.394 - 8.622)  | 0.439   | 2.205  | (0.527 - 9.217)  | 0.273   |
| WIMD<br>quinitle | Q1-Q3          | 1.546  | (0.560 - 4.312)  | 0.400   | 2.326  | (0.830 - 6.506)  | 0.106   |
|                  | Q4-Q5          | 2.276  | (0.901 - 5.783)  | 0.083   | 1.713  | (0.674 - 4.364)  | 0.262   |
| Ratio of RHR*    | (ref:Q1-Q3)    | 1.467  | (0.362 - 5.863)  | 0.589   | 0.739  | (0.189 - 2.973)  | 0.673   |

\* based on variance-weighted least squares estimation

**ESM 1 Table E7a.** Numbers of individuals who self-harmed and deaths within the defined periods corresponded to the waves of COVID-19 pandemic outbreak and the respective pre-pandemic/counterfactual periods.

| Period*        |         | Date                | Self-harm population | Number of deaths | % of death | 95% CI      |
|----------------|---------|---------------------|----------------------|------------------|------------|-------------|
| Counterfactual | Pre-C19 | Oct 2017 - Mar 2018 | 5,612                | 346              | 6.2        | (5.6 - 6.8) |
|                | Wave 1  | Apr 2018 - Sep 2018 | 6,306                | 369              | 5.9        | (5.3 - 6.5) |
|                | Wave 2  | Oct 2018 - Mar 2019 | 6,199                | 281              | 4.5        | (4.0 - 5.1) |
| Actual         | Pre-C19 | Oct 2019 - Mar 2020 | 6,105                | 195              | 3.2        | (2.8 - 3.7) |
|                | Wave 1  | Apr 2020 - Sep 2020 | 5,194                | 167              | 3.2        | (2.8 - 3.7) |
|                | Wave 2  | Oct 2020 - Mar 2021 | 4,724                | 125              | 2.6        | (2.2 - 3.2) |

\* Refer to Methods and Methods in ESM 3 for the definitions of the periods

**ESM 1 Table E7b.** Summary of difference-in-difference estimators (RORs) of excess mortality for individuals who self-harmed during Wave 1 and Wave 2 of the pandemic.

| Wave | Date                | ROR*  | 95% CI          | p-value |
|------|---------------------|-------|-----------------|---------|
| 1    | Apr 2020 - Sep 2020 | 1.064 | (0.822 - 1.379) | 0.637   |
| 2    | Oct 2020 - Mar 2021 | 1.140 | (0.862 - 1.507) | 0.358   |

\* Ratio of odds ratio. Refer to Methods in ESM 3 for its definition



**A**

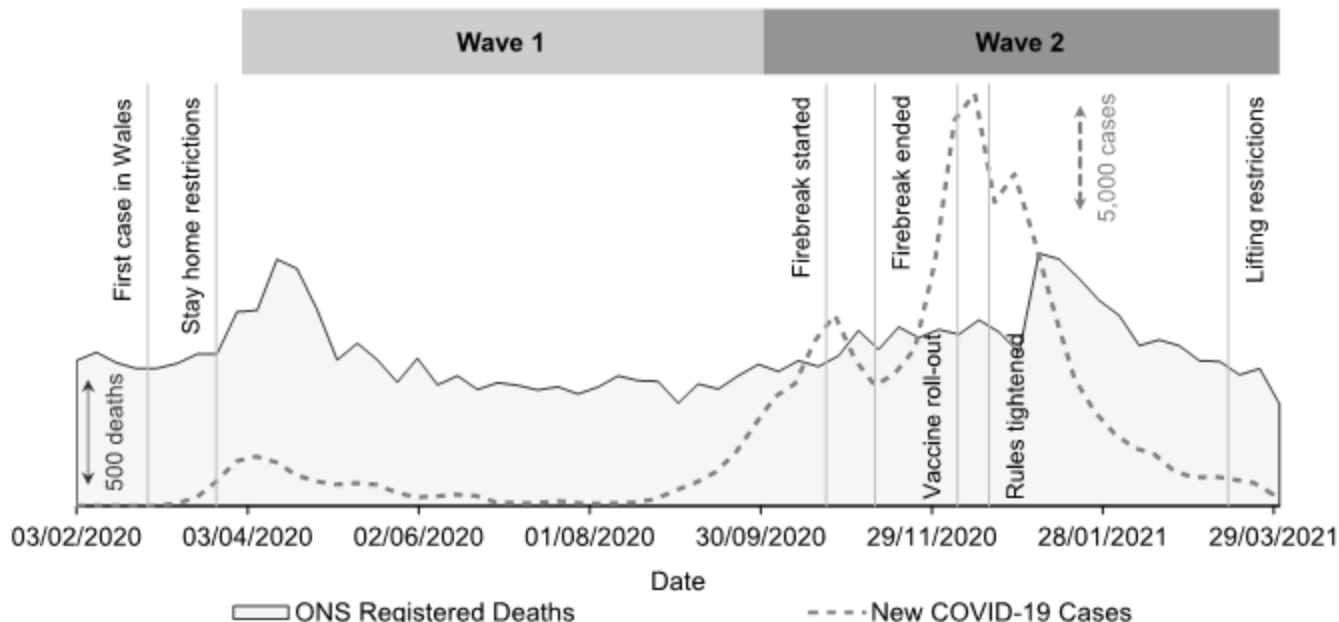

**B**

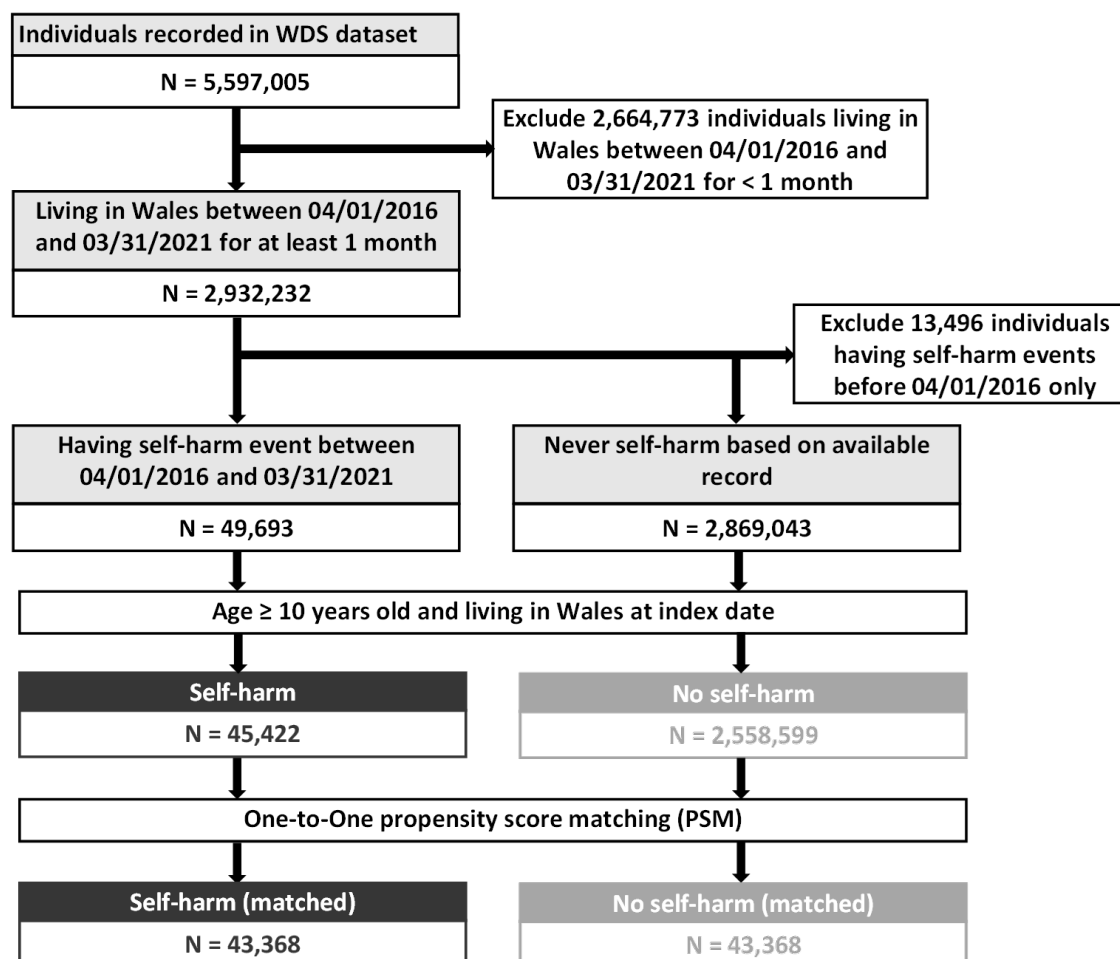

**ESM 1 Figure E1. (A)** The outbreak of the COVID-19 pandemic in Wales, UK from February 2020 to March 2021. Grey dashed line: weekly number of new COVID-19 cases (data extracted from the Public Health Wales COVID-19 interactive data dashboard on 10/25/2021: <https://phw.nhs.wales/news/new-novel-coronavirus-covid-19-data-dashboard-launched/>). Shaded areas: weekly deaths registered in Wales (data extracted from the Office of National Statistics (ONS) released provisional dataset: <https://www.ons.gov.uk/peoplepopulationandcommunity/birthsdeathsandmarriages/deaths/datasets/weekly-provisionalfiguresondeathsregisteredinenglandandwales>). Wave 1 and Wave 2 of the pandemic are defined as from 04/01/2020 to 09/30/2020 and 10/01/2020 to 03/31/2021 respectively in this study. Vertical grey lines: key dates in Wales and the UK in response to COVID-19 (extracted from the Welsh Parliament:

[response/](https://research.senedd.wales/research-articles/coronavirus-timeline-welsh-and-uk-governments-response/)). 'First case in Wales' (02/28/2020): Wales' first COVID-19 case confirmed; 'Stay home restriction' (03/23/2020): The UK Prime Minister addressed the nation that people were required to stay at home except for very limited purposes; 'Firebreak started' (11/02/2020): The firebreak lockdown in Wales began as national restrictions came into effect; 'Firebreak ended' (11/09/2020): The firebreak lockdown in Wales came to an end; 'Vaccine roll-out' (12/08/2020): Health boards in Wales started administering the COVID-19 vaccine. 'Rules tightened' (12/19/2020): The highest level of restrictions were brought to forward across Wales and restriction rules across UK were tightened. 'Lifting restrictions' (03/13/2021): The stay home restrictions were replaced stay local rule in Wales. **(B)** Study flow diagram.

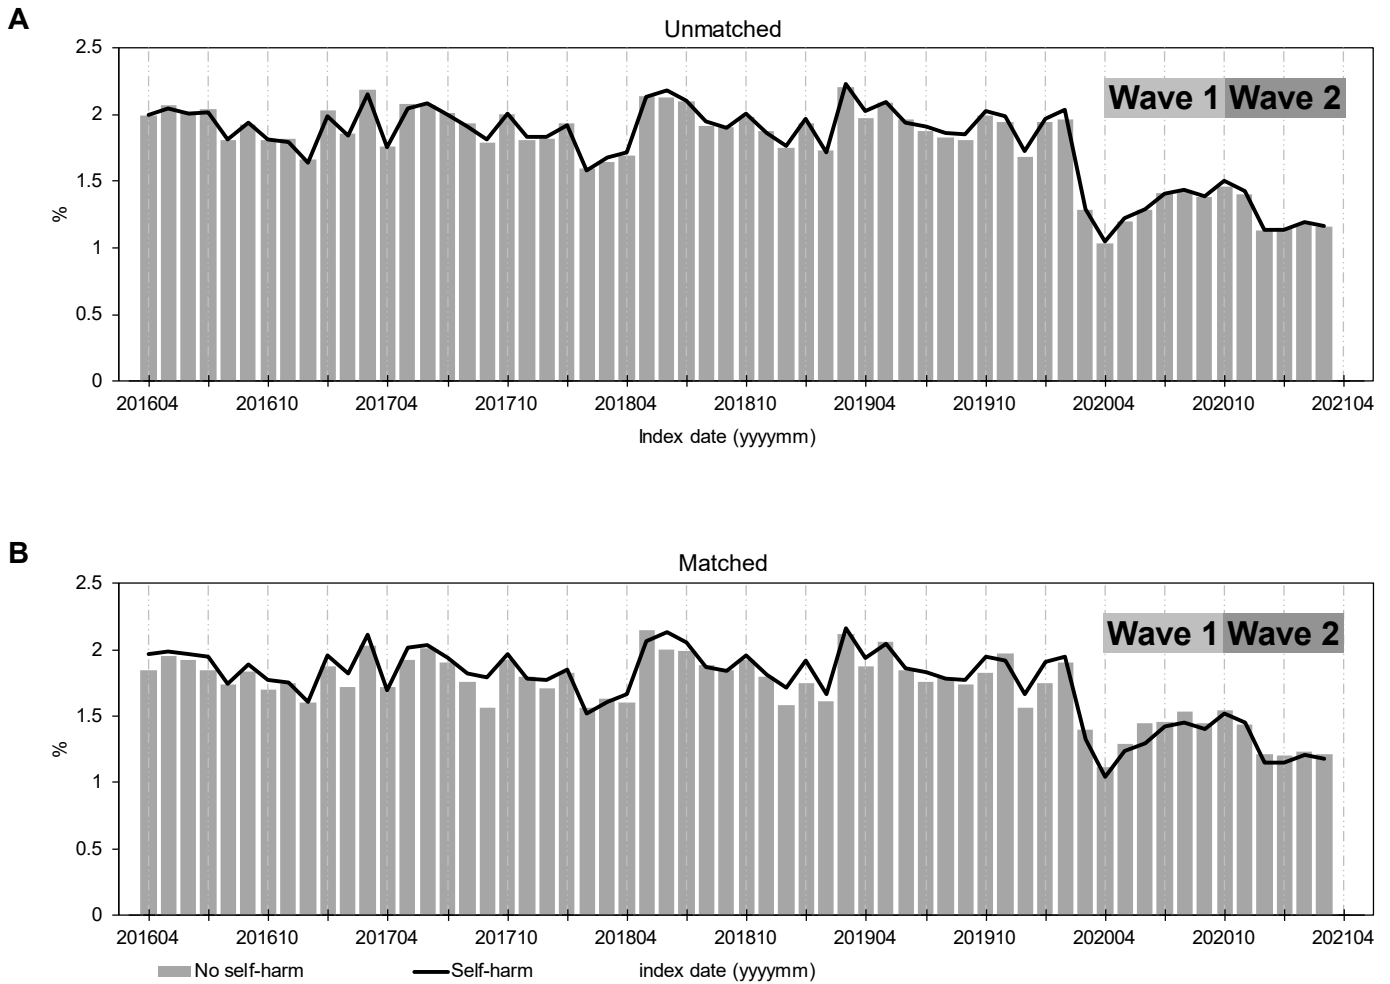

**ESM 1 Figure E2.** Distribution of index dates of individuals who were ascertained to the ‘self-harm’ and ‘no self-harm’ group before (**A**) and after propensity score matching (**B**). Wave 1’: April 2020-September 2020, ‘Wave 2’: October 2020-March 2021.

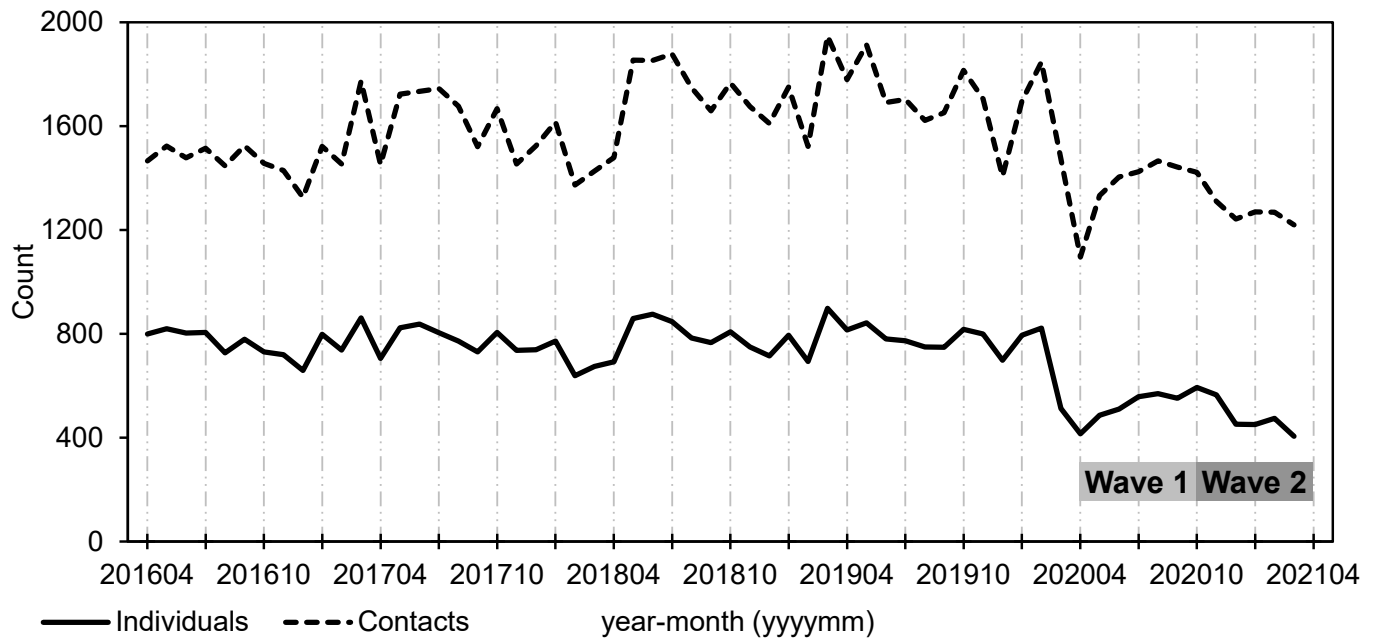

**ESM 1 Figure E3.** Monthly trend of self-harm (number of individuals and contacts to health services) between April 2016 and March 2021 for the study cohort. 'Wave 1': April 2020-September 2020, 'Wave 2': October 2020-March 2021.

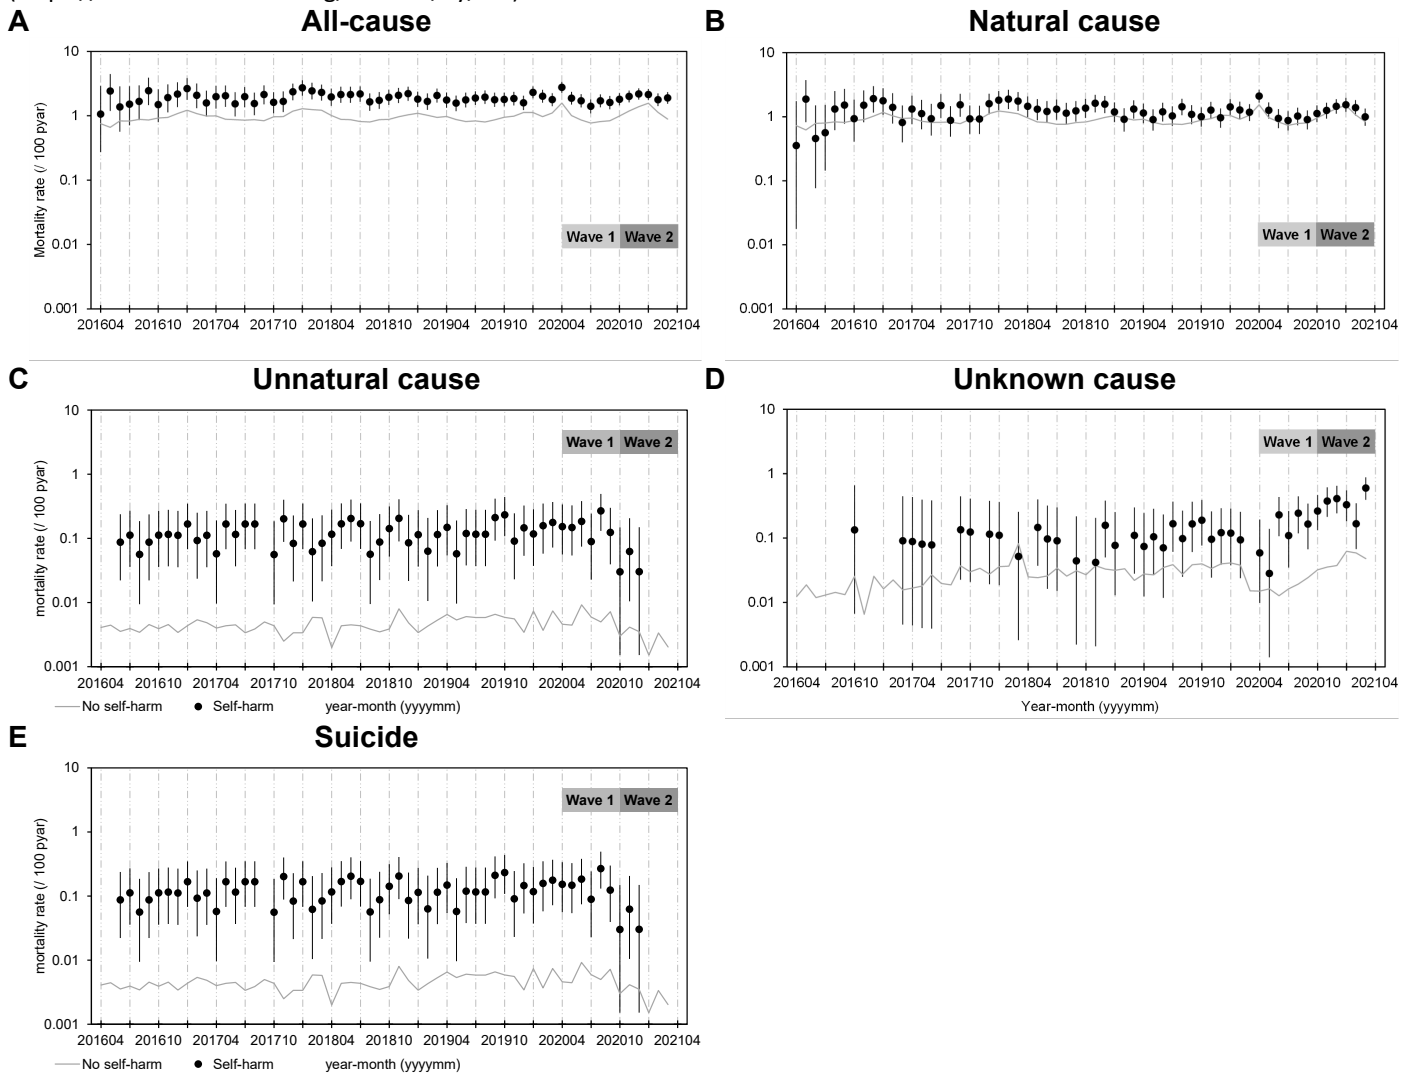

**ESM 1 Figure E4.** Monthly trends (in log-scale) of all-cause (A), natural cause (B), unnatural cause (C), unknown causes (D), and (E) suicide crude mortality rates for the 'self-harm' and 'no self-harm' group from the unmatched self-harm cohort between April 2016 and March 2021. Missing data points represent zero death counts. 'Wave 1': April 2020-September 2020, 'Wave 2': October 2020-March 2021. Error bars: 95% CIs. 'pyar': person-years at risk.

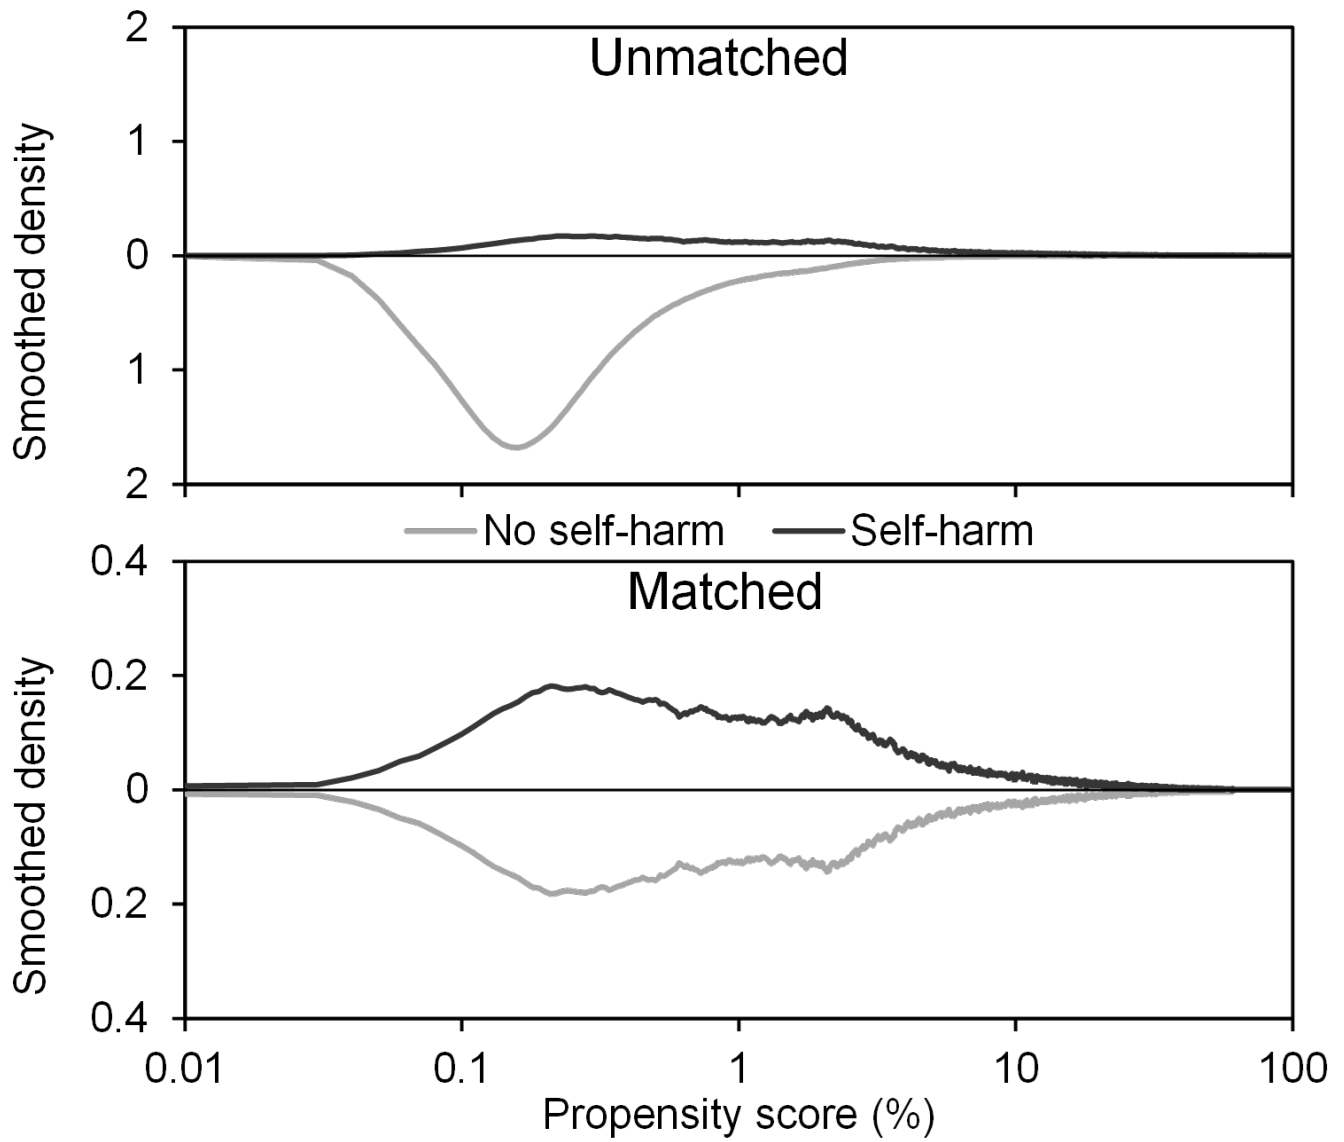

**ESM 1 Figure E5.** Distribution of propensity score before and after matching of the self-harm cohort. Note the log-scale of the horizontal axes.

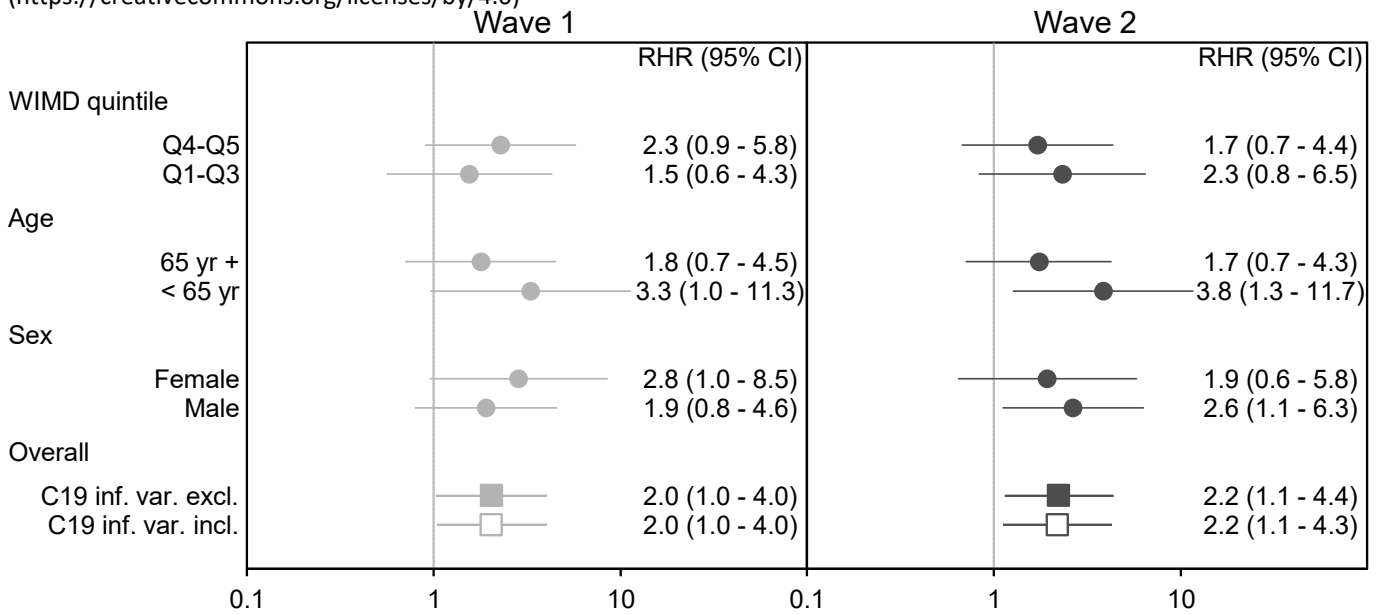

**ESM 1 Figure E6.** Forest plots of ratios of hazard ratios (RHRs, in log-scale) representing the change in mortality risks during COVID-19 between ‘self-harm’ and ‘no self-harm’ group based on difference-in-difference analyses from the matched self-harm cohort. Overall analyses consist of RHRs estimated from models where the COVID-19 infection variable is included (‘C19 inf. var. incl.’) or excluded (‘C19 inf. var. excl.’). Subgroup analyses are performed by sex, age and WIMD quintile ascertained at index date. Error bars: 95% CIs.
